# Supplementary material for: Experimental and theoretical evaluation on the antioxidant activity of a copper(ii) complex based on lidocaine and ibuprofen amide-phenanthroline agents
Source: PubMed Central journal article supplement (PMC9060296; doi:10.1039/c8ra09763a), 2019-01-25
Supplement: RA-009-C8RA09763A-s001.pdf [file RA-009-C8RA09763A-s001.pdf]

## Supporting Information

# Experimental and Theoretical Evaluation on the Antioxidant Activity of a Copper (II) Complex Based on Lidocaine and Ibuprofen Amide-Phenanthroline Agents

Leila Tabrizi<sup>1\*†</sup>, Duy Quang Dao<sup>2\*†</sup>, Thuy An Vu<sup>3</sup>,

<sup>1</sup>School of Chemistry, National University of Ireland, Galway, University Road,  
Galway, H91 TK33, Ireland.

<sup>2</sup>Institute of Research and Development, Duy Tan University, 03 Quang Trung, Da Nang,  
550000, Viet Nam.

<sup>3</sup>Faculty of Environment and Chemical Engineering, Duy Tan University, 03 Quang Trung, Da  
Nang, 550000, Viet Nam

Corresponding author: Leila Tabrizi; Email: LEILA.TABRIZI@nuigalway.ie

Corresponding author: Duy Quang Dao; Email: daoduyquang@gmail.com

## LIST OF SUPPORTING INFORMATION

**Figure S1.**  $^1\text{H}$  NMR spectrum of ligand ibuprofen amide-phenanthroline (Ibu-phen) ( $\text{DMSO-}d_6$ ).

**Figure S2.**  $^{13}\text{C}$  NMR spectrum of ligand ibuprofen amide-phenanthroline (Ibu-phen) ( $\text{DMSO-}d_6$ ).

**Figure S3.** TOF MS spectrum of ligand ibuprofen amide-phenanthroline (Ibu-phen).

**Figure S4.** TOF MS spectrum of copper (II) complex.

**Figure S5.** FT-IR of ligand LC.

**Figure S6.** FT-IR of ligand Ibu-phen.

**Figure S7.** FT-IR of copper (II) complex

**Figure S8.** UV-Vis spectra of copper (II) complex in DMSO solution (**a**) and solid state (**b**).

**Figure S9.** UV/Vis spectra of copper (II) complex in DMSO solution at room temperature during 72h.

**Table S1.** Cartesian coordinates and molecular enthalpies of copper (II) complex structures for different multiplicities from 2 to 8 optimized at M05-2X/LanL2DZ level of theory.

**Table S2.** Natural population charges of heavy atoms in the copper (II) complex calculated at the M05-2X/6-311++g(2df,2p) level of theory.

**Table S3.** Natural bond orbital (NBO) analysis of the copper (II) complex calculated at the M05-2X/6-311++g(2df,2p) level of theory

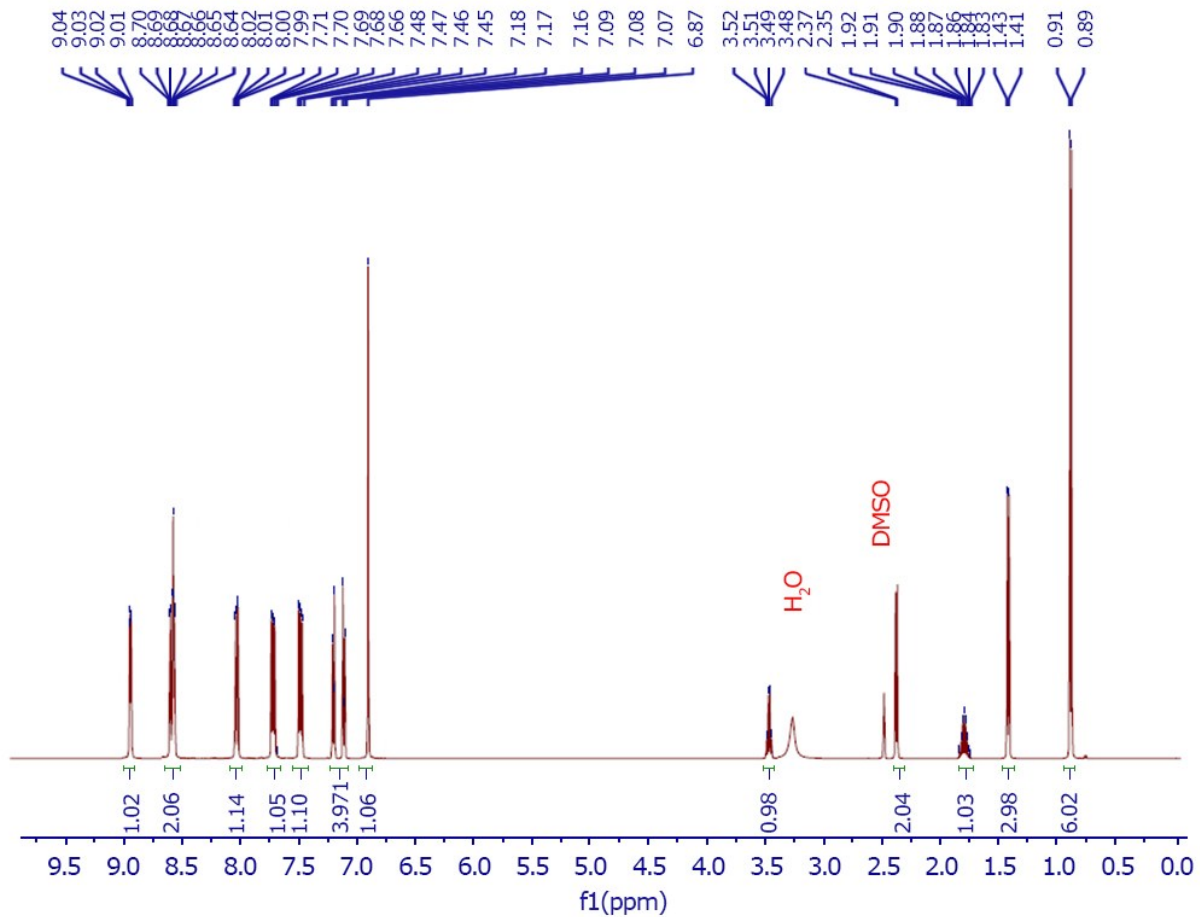

**Figure S1.** <sup>1</sup>H NMR spectrum of ligand ibuprofen amide-phenanthroline (Ibu-phen) (DMSO-*d*<sub>6</sub>).

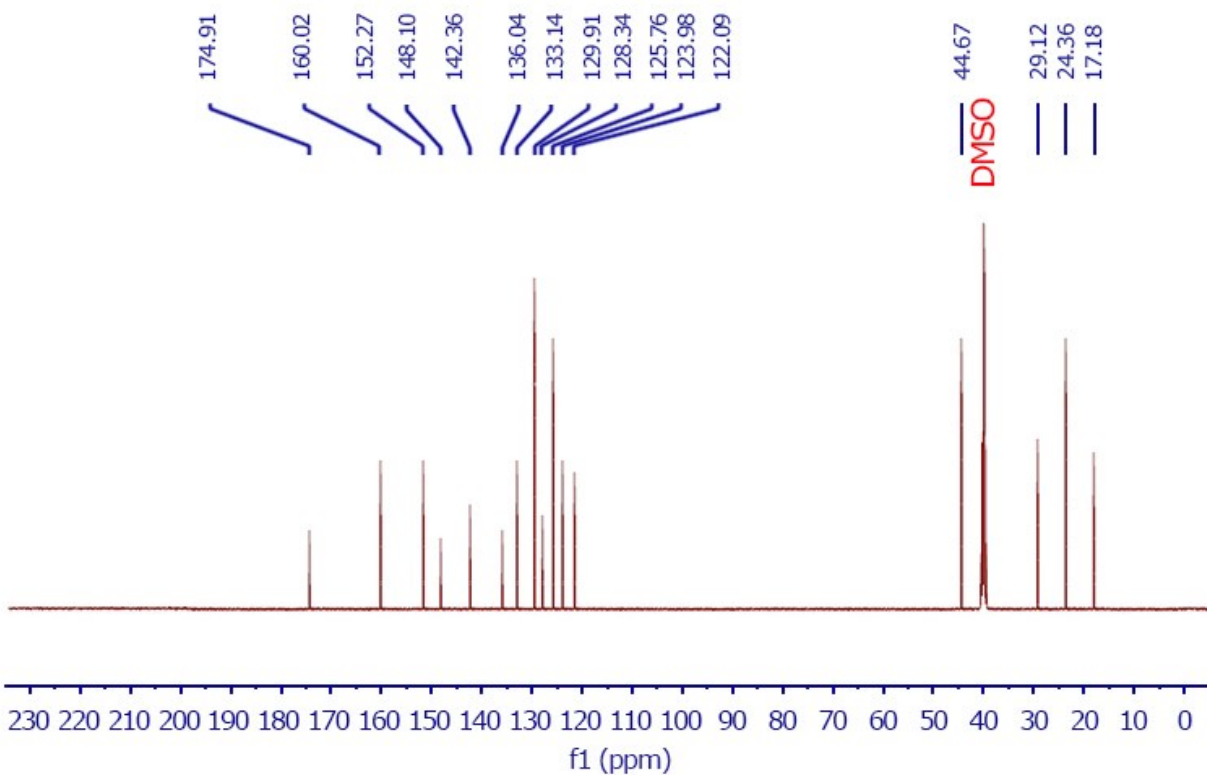

**Figure S2.**  $^{13}\text{C}$  NMR spectrum of ligand ibuprofen amide-phenanthroline (Ibu-phen) ( $\text{DMSO-}d_6$ ).

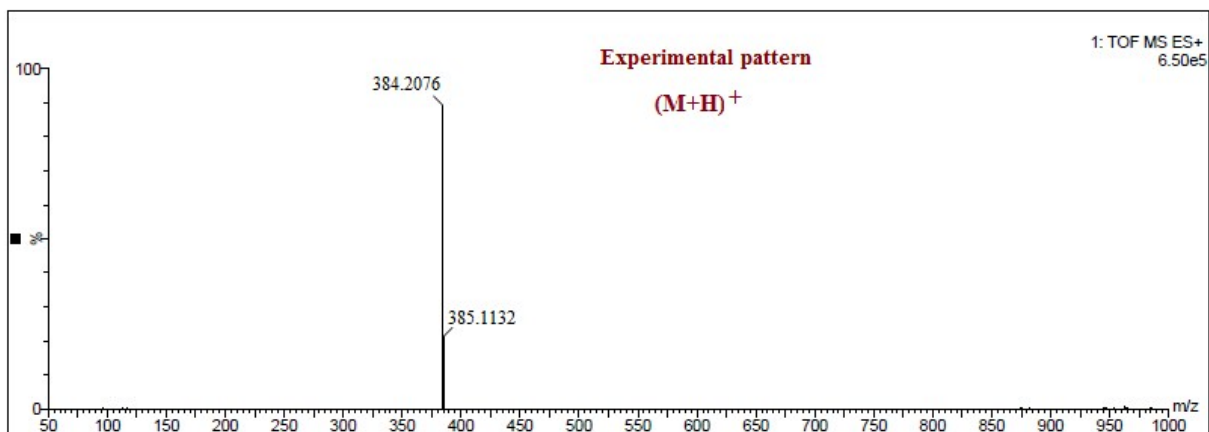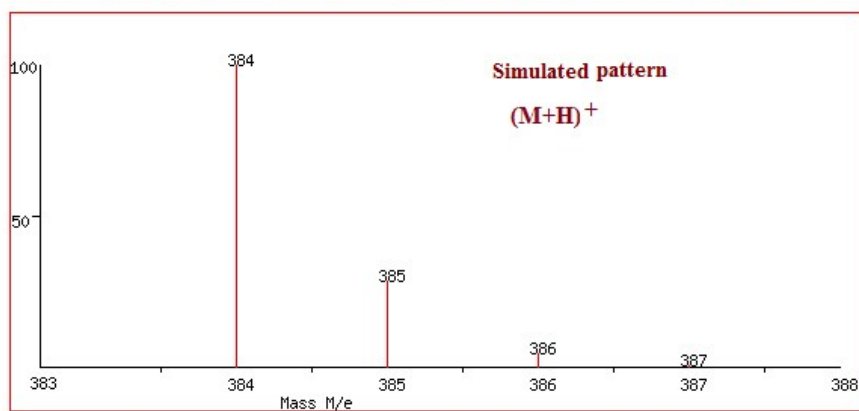

**Figure S3.** TOF MS spectrum of ligand ibuprofen amide-phenanthroline (Ibu-phen).

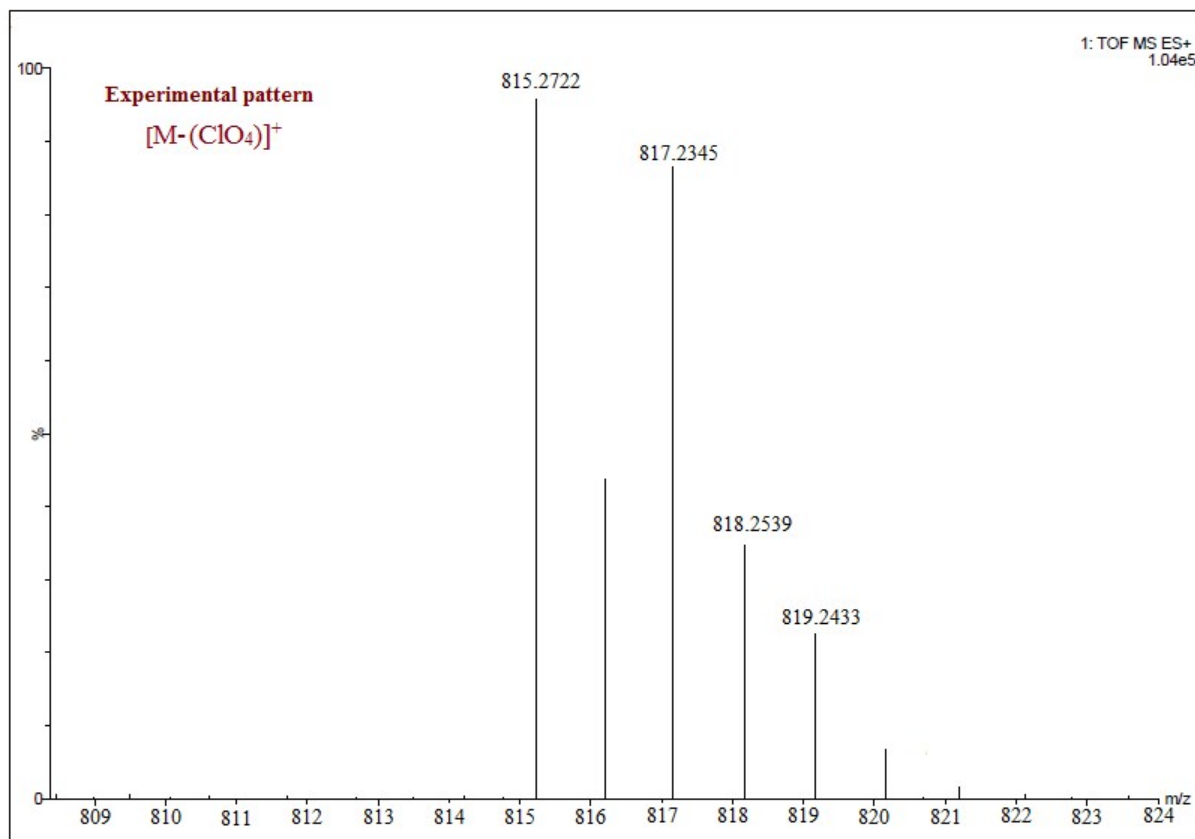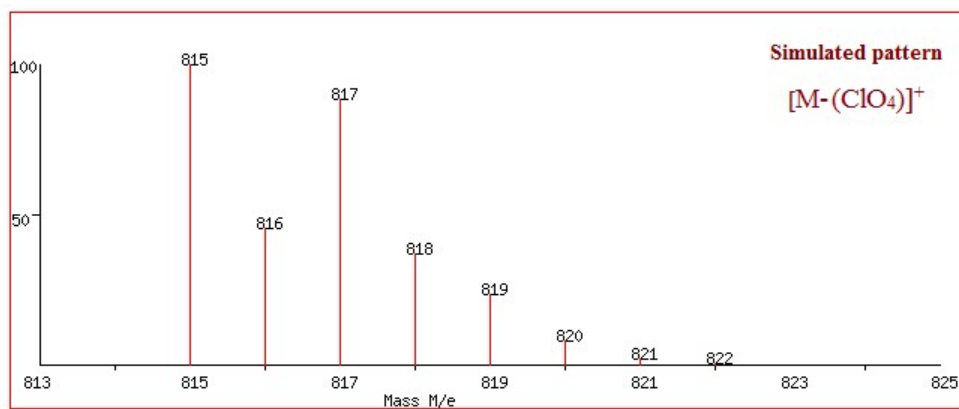

**Figure S4.** TOF MS spectrum of copper (II) complex.

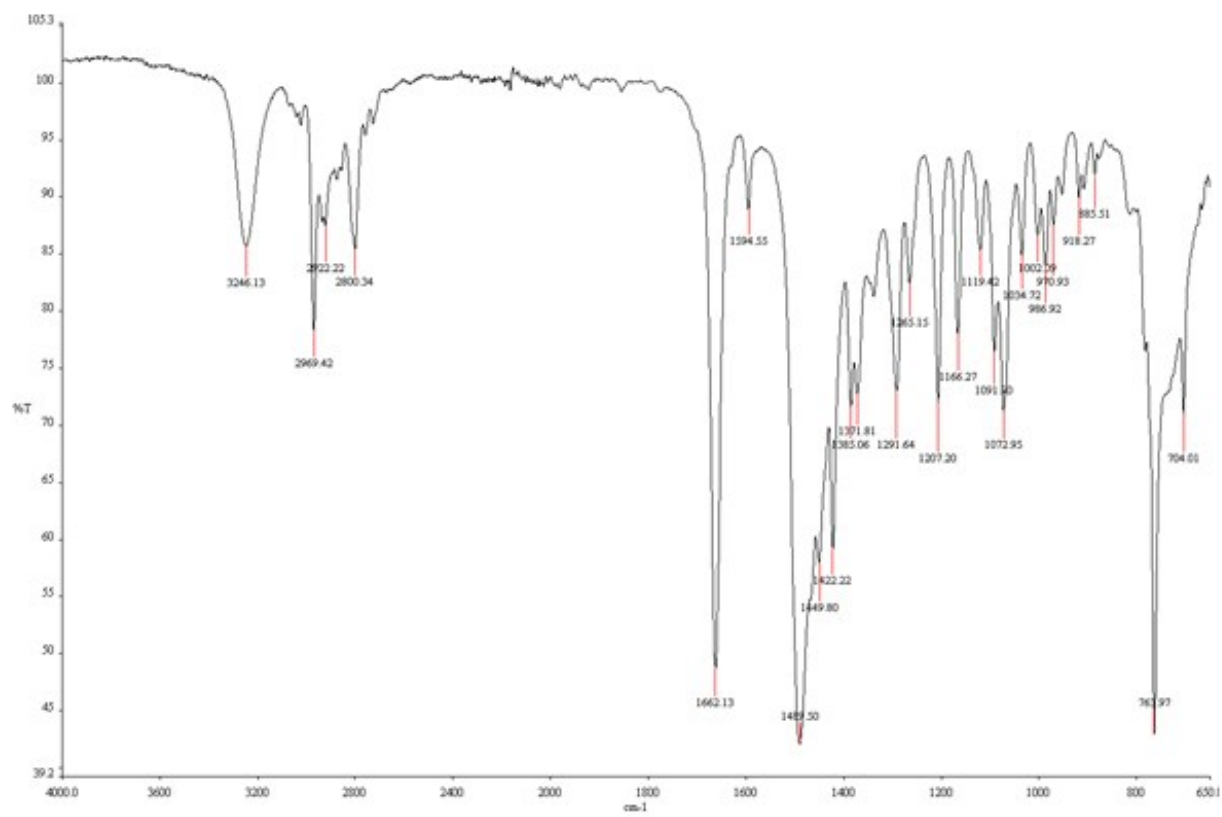

**Figure S5.** FT-IR of ligand LC

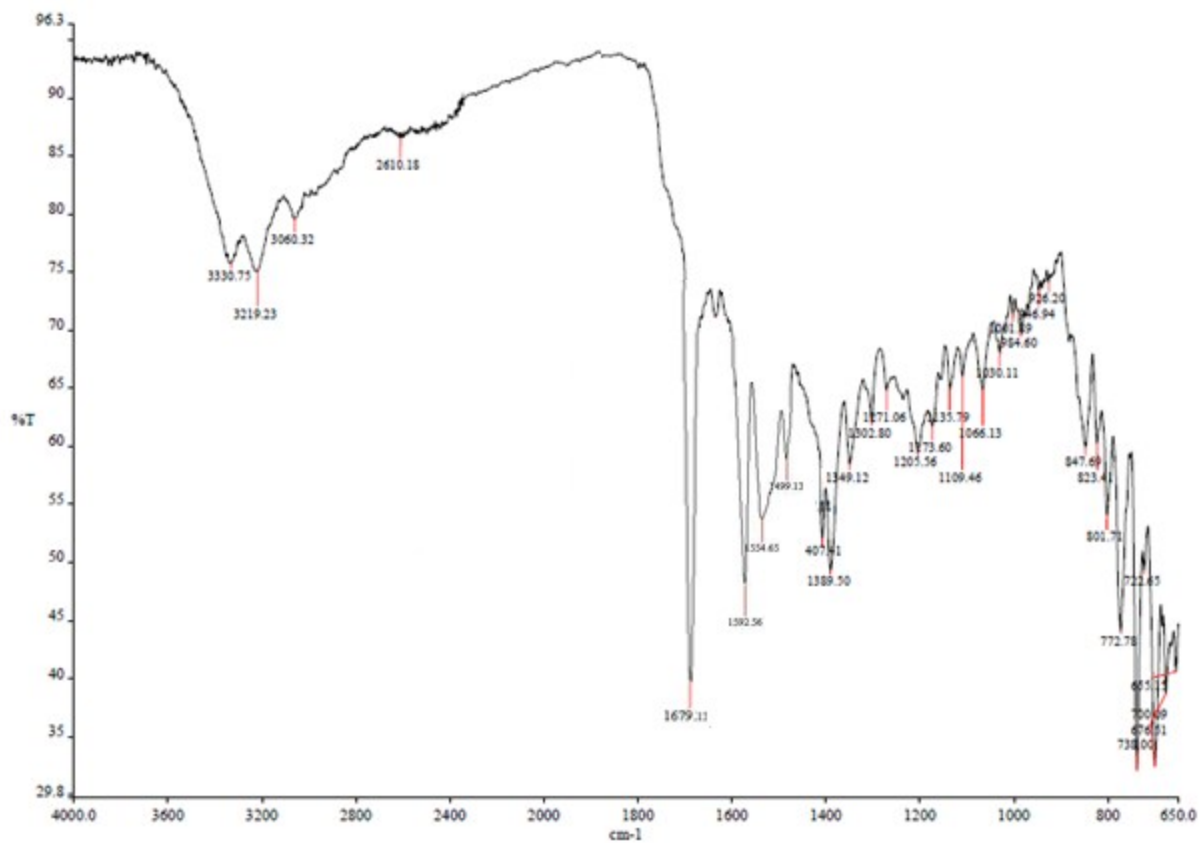

**Figure S6.** FT-IR of ligand Ibu-phen



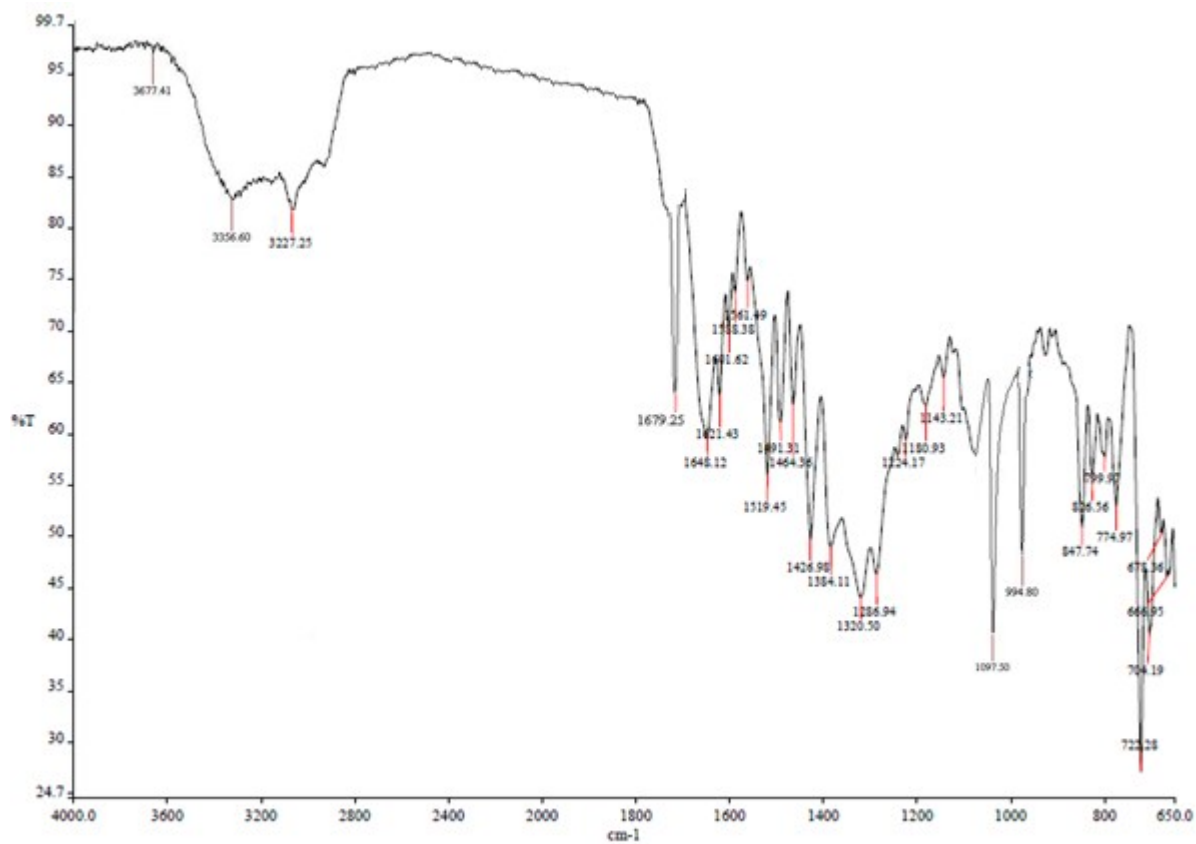

**Figure S7.** FT-IR of copper (II) complex

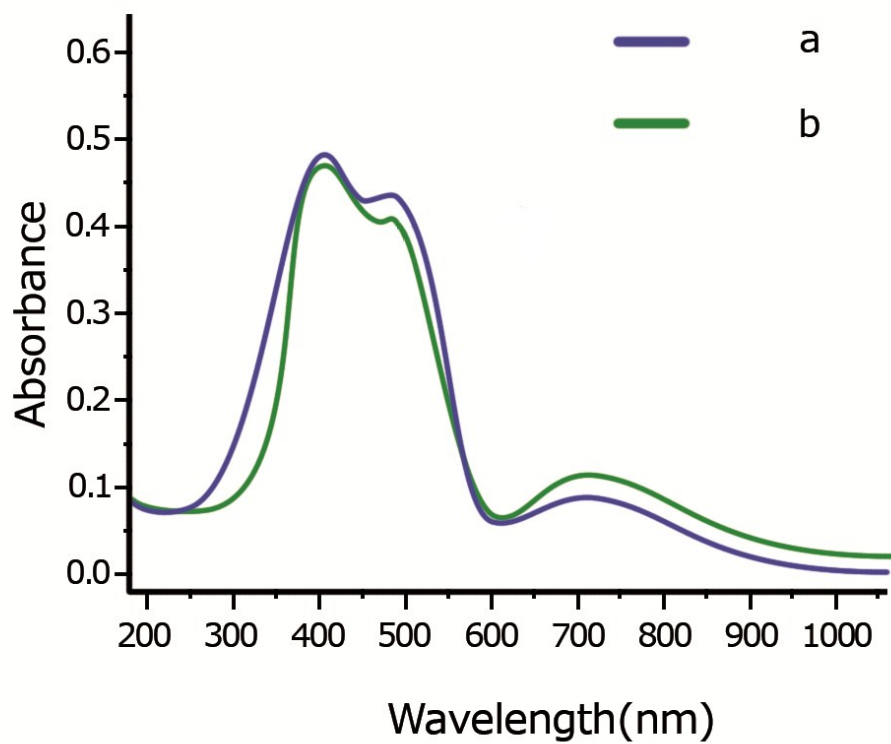

**Figure S8.** UV-Vis spectra of copper (II) complex in DMSO solution (**a**) and solid state (**b**).

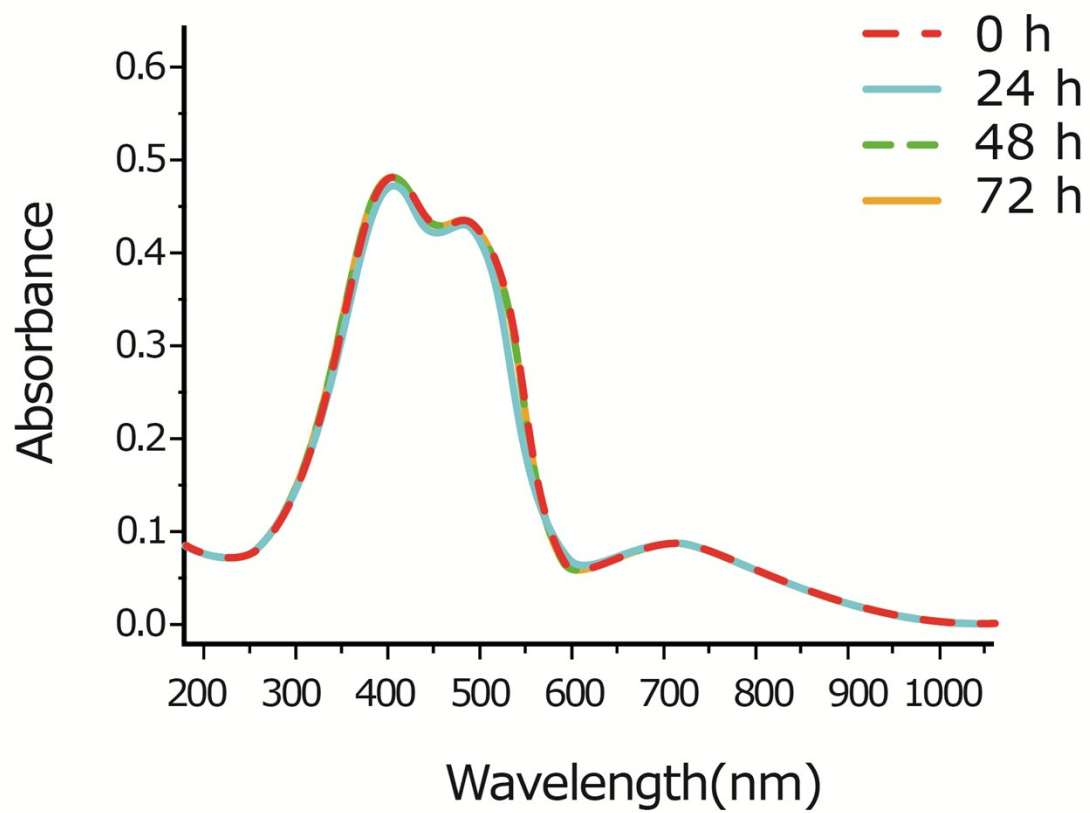

**Figure S9.** UV/Vis spectra of copper (II) complex in DMSO solution at room temperature during 72h.

**Table S1.** Cartesian coordinates and molecular enthalpies of copper (II) complex structures for different multiplicities from 2 to 8 optimized at M05-2X/LanL2DZ level of theory.

| Cartesian coordinates |            |             |             | Multiplicity = 2                                                                    |
|-----------------------|------------|-------------|-------------|-------------------------------------------------------------------------------------|
| 2                     | 2          |             |             | 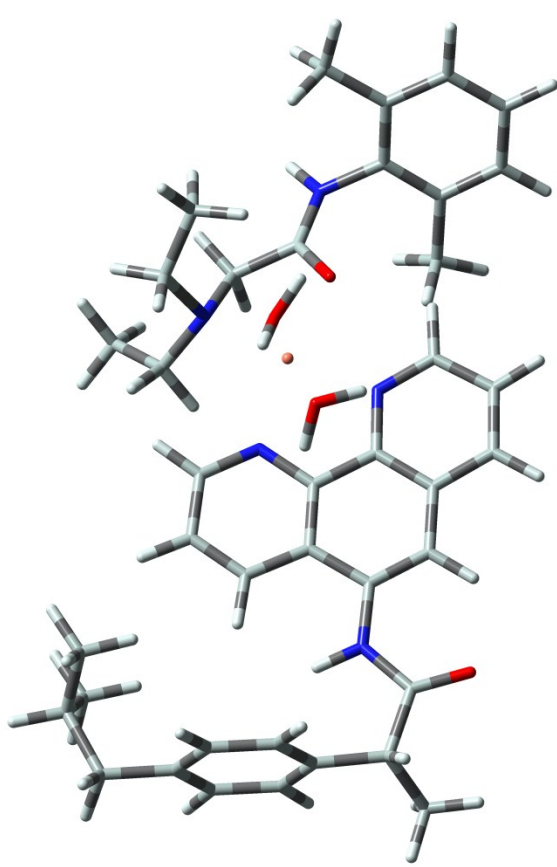 |
| O                     | 4.43015200 | -2.94646300 | -3.64407200 |                                                                                     |
| C                     | 6.64647300 | 3.10689200  | 1.57653000  |                                                                                     |
| C                     | 7.86517100 | 2.46505800  | 0.86090100  |                                                                                     |
| C                     | 7.51176400 | 1.33448300  | -0.08049600 |                                                                                     |
| C                     | 6.87722700 | -0.79984000 | -1.85974900 |                                                                                     |
| C                     | 6.47210500 | -1.90782800 | -2.81847100 |                                                                                     |
| C                     | 5.66834400 | 3.74750200  | 0.58021700  |                                                                                     |
| C                     | 5.91997500 | 2.10198800  | 2.48337300  |                                                                                     |
| C                     | 7.46834900 | 0.00190700  | 0.36850700  |                                                                                     |
| C                     | 7.24648300 | 1.57906900  | -1.44103500 |                                                                                     |
| C                     | 7.15412100 | -1.05002400 | -0.50383500 |                                                                                     |
| C                     | 6.93161800 | 0.53056100  | -2.31483700 |                                                                                     |
| C                     | 7.15002100 | -3.26846400 | -2.55136000 |                                                                                     |
| C                     | 4.95723900 | -2.13043200 | -2.86436200 |                                                                                     |
| H                     | 7.05055600 | 3.90288700  | 2.21139200  |                                                                                     |
| H                     | 8.55725300 | 2.09767700  | 1.62508100  |                                                                                     |
| H                     | 8.38838100 | 3.24892200  | 0.30449000  |                                                                                     |
| H                     | 6.74066200 | -1.60385400 | -3.83549000 |                                                                                     |
| H                     | 5.22502800 | 2.98840200  | -0.07571600 |                                                                                     |
| H                     | 6.17216700 | 4.48048000  | -0.05620200 |                                                                                     |
| H                     | 4.86237500 | 4.26569600  | 1.11099100  |                                                                                     |
| H                     | 5.11779600 | 2.59728100  | 3.04115900  |                                                                                     |
| H                     | 5.48458900 | 1.28651900  | 1.89306400  |                                                                                     |
| H                     | 6.60435200 | 1.65540600  | 3.21028500  |                                                                                     |
| H                     | 7.70854000 | -0.21624400 | 1.40323700  |                                                                                     |
| H                     | 7.31316300 | 2.59229900  | -1.82131000 |                                                                                     |
| H                     | 7.15497300 | -2.06613900 | -0.12832000 |                                                                                     |
| H                     | 6.74910800 | 0.74300800  | -3.36316100 |                                                                                     |
| H                     | 8.23396300 | -3.14572000 | -2.54535900 |                                                                                     |
| H                     | 6.84340900 | -3.69397200 | -1.59291200 |                                                                                     |
| H                     | 6.87589300 | -3.97468100 | -3.33504100 |                                                                                     |
| N                     | 4.21175500 | -1.36298400 | -1.97195000 |                                                                                     |
| H                     | 4.77876200 | -0.75554800 | -1.39564400 |                                                                                     |
| C                     | 3.07414000 | 0.55222200  | -0.14471800 |                                                                                     |
| C                     | 2.28357200 | -0.38758800 | -0.85766200 |                                                                                     |
| C                     | 2.46744000 | 1.45233200  | 0.71926600  |                                                                                     |
| C                     | 0.88708400 | -0.35560200 | -0.62801000 |                                                                                     |
| C                     | 2.82667000 | -1.34763300 | -1.81625800 |                                                                                     |
| C                     | 1.07111500 | 1.40550800  | 0.89635000  |                                                                                     |
| H                     | 3.05299100 | 2.18679000  | 1.25318900  |                                                                                     |
| C                     | 0.01713000 | -1.22187200 | -1.37216500 |                                                                                     |
| C                     | 1.97624500 | -2.17172900 | -2.52399100 |                                                                                     |
| H                     | 0.58648900 | 2.10649400  | 1.55622100  |                                                                                     |

|   |             |             |             |
|---|-------------|-------------|-------------|
| C | 0.56109000  | -2.10508300 | -2.32435600 |
| H | 2.38561000  | -2.86465200 | -3.24399200 |
| C | -0.35786100 | -2.90136600 | -3.06426700 |
| C | -2.18050000 | -1.85783100 | -1.85701300 |
| C | -1.71890900 | -2.77169800 | -2.83584800 |
| H | 0.01658800  | -3.59392000 | -3.80742300 |
| H | -3.23299900 | -1.71907100 | -1.65193800 |
| H | -2.43736100 | -3.35351900 | -3.39510100 |
| H | 4.14925200  | 0.60872000  | -0.26584000 |
| N | -1.32403700 | -1.11610300 | -1.14670300 |
| N | 0.29857400  | 0.51708600  | 0.25708300  |
| O | -3.67411300 | -0.34559300 | 0.17104200  |
| N | -2.52313600 | 1.23193100  | 2.03480400  |
| N | -5.67673000 | -0.49044500 | 1.27531100  |
| C | -3.71334700 | 0.42763600  | 2.43958700  |
| C | -1.52135900 | 1.24630100  | 3.16929600  |
| C | -2.88518800 | 2.66214300  | 1.68623900  |
| C | -6.38255900 | -1.16681800 | 0.20188500  |
| C | -4.39209400 | -0.14803600 | 1.21404300  |
| C | -7.39048000 | -0.45752800 | -0.47422500 |
| C | -6.06298900 | -2.50504200 | -0.08805000 |
| C | -2.10323500 | 1.52499300  | 4.56275200  |
| C | -4.17624000 | 2.82869500  | 0.88470200  |
| C | -8.08941400 | -1.12565300 | -1.49015500 |
| C | -6.78073300 | -3.13767900 | -1.11411600 |
| C | -7.71819300 | 0.97326700  | -0.11445300 |
| C | -5.00025900 | -3.25659700 | 0.68002600  |
| C | -7.78519300 | -2.45429900 | -1.81142600 |
| H | -3.35492000 | -0.42668500 | 3.01971700  |
| H | -4.40583400 | 1.00390000  | 3.05963700  |
| H | -1.00234000 | 0.28679400  | 3.16540700  |
| H | -0.80108600 | 2.02945200  | 2.93537900  |
| H | -2.96959700 | 3.23461200  | 2.61560700  |
| H | -2.04772000 | 3.06292200  | 1.11313300  |
| H | -6.20425900 | -0.25550100 | 2.11046600  |
| H | -2.66714100 | 2.45934200  | 4.60399100  |
| H | -2.74299000 | 0.71603500  | 4.91955100  |
| H | -1.27930200 | 1.61598500  | 5.27368100  |
| H | -4.17250600 | 2.23344700  | -0.02786600 |
| H | -5.06489600 | 2.58132900  | 1.47106600  |
| H | -4.27084600 | 3.87816800  | 0.59841400  |
| H | -8.87458000 | -0.60574800 | -2.02454500 |
| H | -6.56821300 | -4.17317900 | -1.35084000 |
| H | -8.15598700 | 1.04952700  | 0.88664700  |
| H | -6.82804700 | 1.60848100  | -0.14258000 |
| H | -8.44497000 | 1.38518900  | -0.81423300 |
| H | -5.06497200 | -3.06737900 | 1.75516400  |
| H | -5.10624100 | -4.33026800 | 0.52419200  |

|                                      |             |             |             |                  |
|--------------------------------------|-------------|-------------|-------------|------------------|
| H                                    | -4.00064600 | -2.96306300 | 0.33649000  |                  |
| H                                    | -8.33843000 | -2.95981000 | -2.59207700 |                  |
| Cu                                   | -1.75995900 | 0.19445300  | 0.33526400  |                  |
| O                                    | -1.54409600 | -1.70684100 | 1.75248600  |                  |
| H                                    | -0.78523000 | -2.01669300 | 2.27972800  |                  |
| H                                    | -1.98738100 | -2.44890700 | 1.30046600  |                  |
| O                                    | -1.96814800 | 1.81395200  | -1.22621000 |                  |
| H                                    | -2.73226600 | 1.78382100  | -1.82972000 |                  |
| H                                    | -1.20351700 | 2.26070700  | -1.63110900 |                  |
| Energy calculation at M05-2X/LanL2DZ |             |             |             | HF=-2286.8279716 |

| Cartesian coordinates |             |             |             | Multiplicity = 6 |
|-----------------------|-------------|-------------|-------------|------------------|
| 2 6                   |             |             |             |                  |
| O                     | 4.67464200  | -1.71597400 | -0.84696000 |                  |
| C                     | 10.85489000 | 0.04351200  | 2.32768200  |                  |
| C                     | 10.94613900 | -0.45310200 | 0.81534700  |                  |
| C                     | 9.65028000  | -0.34224400 | 0.11818400  |                  |
| C                     | 7.16379400  | -0.12333400 | -1.23399900 |                  |
| C                     | 5.91250400  | -0.01679900 | -2.05938700 |                  |
| C                     | 10.48403400 | 1.52882500  | 2.41899400  |                  |
| C                     | 9.90420100  | -0.82852500 | 3.15665100  |                  |
| C                     | 8.70662800  | -1.42830500 | 0.13221100  |                  |
| C                     | 9.29628100  | 0.86905900  | -0.58610800 |                  |
| C                     | 7.50219300  | -1.33093000 | -0.52356500 |                  |
| C                     | 8.09326100  | 0.96981200  | -1.24310600 |                  |
| C                     | 6.13261600  | -0.85152700 | -3.36648700 |                  |
| C                     | 4.66602800  | -0.57871800 | -1.36811100 |                  |
| H                     | 11.87351200 | -0.09003000 | 2.70157000  |                  |
| H                     | 11.28216100 | -1.49248800 | 0.84684600  |                  |
| H                     | 11.70441100 | 0.16515600  | 0.32780900  |                  |
| H                     | 5.75626100  | 1.02742600  | -2.34056900 |                  |
| H                     | 9.44730500  | 1.70291200  | 2.11161100  |                  |
| H                     | 11.14360600 | 2.15300600  | 1.80897000  |                  |
| H                     | 10.57854700 | 1.86632100  | 3.45363600  |                  |
| H                     | 9.98142600  | -0.55265500 | 4.21093900  |                  |
| H                     | 8.86117000  | -0.68510200 | 2.85599200  |                  |
| H                     | 10.15106800 | -1.89110600 | 3.07654400  |                  |
| H                     | 8.97009100  | -2.33453000 | 0.66208800  |                  |
| H                     | 10.00443400 | 1.68771400  | -0.59660700 |                  |
| H                     | 6.78673300  | -2.14142600 | -0.51369800 |                  |
| H                     | 7.84047400  | 1.87345300  | -1.78362900 |                  |
| H                     | 7.01216700  | -0.49862200 | -3.90719400 |                  |
| H                     | 6.25888200  | -1.90596300 | -3.11724500 |                  |
| H                     | 5.25975400  | -0.74694900 | -4.01377900 |                  |
| N                     | 3.55409000  | 0.23308500  | -1.42860400 |                  |
| H                     | 3.68626600  | 1.16856800  | -1.79628600 |                  |

|   |             |             |             |
|---|-------------|-------------|-------------|
| C | 1.65380300  | 2.35988300  | -0.92323100 |
| C | 1.31852100  | 0.97977600  | -0.89560500 |
| C | 0.60367100  | 3.32360900  | -0.86864000 |
| C | -0.06557600 | 0.62686000  | -0.72491200 |
| C | 2.24064800  | -0.08217600 | -1.05731500 |
| C | -0.70129700 | 2.91670600  | -0.72262300 |
| H | 0.82746500  | 4.37889700  | -0.93677100 |
| C | -0.48569300 | -0.73584200 | -0.69603400 |
| C | 1.80517700  | -1.50435100 | -1.00910700 |
| H | -1.51086300 | 3.63191400  | -0.70764500 |
| C | 0.46041900  | -1.81588700 | -0.85818300 |
| H | 2.54792100  | -2.28145700 | -1.09524500 |
| C | -0.05171800 | -3.15234100 | -0.85887900 |
| C | -2.30713300 | -2.28174200 | -0.60065900 |
| C | -1.45656700 | -3.35444400 | -0.75170800 |
| H | 0.62356100  | -3.98895800 | -0.97222400 |
| H | -3.38160800 | -2.38229300 | -0.53856200 |
| H | -1.86732700 | -4.35335100 | -0.79851500 |
| H | 2.67949200  | 2.70500700  | -0.94346200 |
| N | -1.81922700 | -0.95950500 | -0.52127500 |
| N | -1.05508300 | 1.57377800  | -0.60053400 |
| O | -4.58546500 | -0.20933500 | -0.26343700 |
| N | -3.85753700 | 2.10359600  | 0.94963400  |
| N | -6.55206800 | -0.41618800 | 0.88089900  |
| C | -4.91743400 | 1.27647100  | 1.59755400  |
| C | -2.83409300 | 2.52281200  | 1.98233400  |
| C | -4.45658700 | 3.30383000  | 0.27147000  |
| C | -6.99024200 | -1.58229600 | 0.13455200  |
| C | -5.37303900 | 0.17149000  | 0.66814500  |
| C | -7.77459900 | -1.39443300 | -1.01424700 |
| C | -6.60775200 | -2.85046100 | 0.60284500  |
| C | -3.38867900 | 3.36906100  | 3.13548600  |
| C | -5.46077400 | 2.94710900  | -0.82298700 |
| C | -8.19949800 | -2.53756400 | -1.70794600 |
| C | -7.04788000 | -3.97081400 | -0.11746100 |
| C | -8.13957500 | -0.00873700 | -1.49215200 |
| C | -5.75763300 | -2.99888900 | 1.84335200  |
| C | -7.84036500 | -3.81607600 | -1.26245200 |
| H | -4.46989600 | 0.76618400  | 2.45450200  |
| H | -5.75983800 | 1.89006300  | 1.93384400  |
| H | -2.39193600 | 1.60166400  | 2.36486000  |
| H | -2.05390600 | 3.07599600  | 1.45934500  |
| H | -4.94391500 | 3.93136000  | 1.02622800  |
| H | -3.63175800 | 3.88018100  | -0.15245700 |
| H | -7.14529300 | -0.07023200 | 1.62702100  |
| H | -3.72714600 | 4.35456600  | 2.81135700  |
| H | -4.21171500 | 2.87189700  | 3.65566900  |
| H | -2.59365900 | 3.52484800  | 3.86830700  |

|                                      |             |             |             |
|--------------------------------------|-------------|-------------|-------------|
| H                                    | -4.99924600 | 2.33236600  | -1.59615200 |
| H                                    | -6.33492900 | 2.42594500  | -0.42107500 |
| H                                    | -5.82513800 | 3.86683100  | -1.28622600 |
| H                                    | -8.81431200 | -2.42476900 | -2.59244500 |
| H                                    | -6.77747500 | -4.96242300 | 0.22437800  |
| H                                    | -8.66857200 | 0.55995500  | -0.72187500 |
| H                                    | -7.24537800 | 0.55863000  | -1.76976100 |
| H                                    | -8.78744400 | -0.06378400 | -2.36721200 |
| H                                    | -6.28617500 | -2.64208800 | 2.73302400  |
| H                                    | -5.50699500 | -4.04747400 | 2.00812600  |
| H                                    | -4.82584600 | -2.43055000 | 1.76395300  |
| H                                    | -8.18072700 | -4.68959400 | -1.80359800 |
| Cu                                   | -2.85279100 | 0.75663300  | -0.37446600 |
| O                                    | -2.76931600 | -0.76220300 | 2.29347900  |
| H                                    | -2.48061500 | -1.27746600 | 3.06645400  |
| H                                    | -2.30369300 | -1.02485900 | 1.47145300  |
| O                                    | -3.42497700 | 0.88731900  | -2.49929200 |
| H                                    | -4.05110700 | 0.16707300  | -2.69915700 |
| H                                    | -2.79870600 | 1.06639500  | -3.22118400 |
| Energy calculation at M05-2X/LanL2DZ |             |             |             |
| HF=-2286.6231164                     |             |             |             |

| Cartesian coordinates |             |             |             | Multiplicity = 8                                                                     |
|-----------------------|-------------|-------------|-------------|--------------------------------------------------------------------------------------|
| 2 8                   |             |             |             | 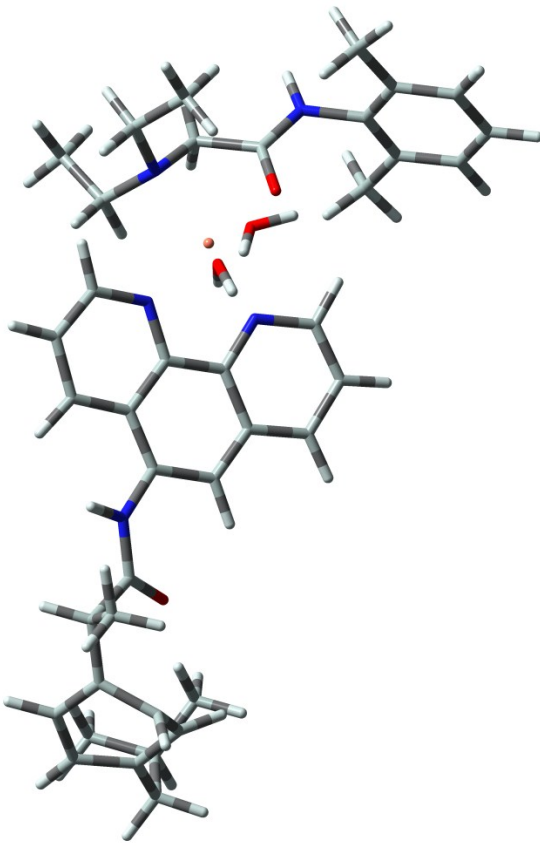 |
| O                     | 5.29078900  | -0.40028400 | -0.69638500 |                                                                                      |
| C                     | 8.60581100  | -1.74648600 | 2.43964700  |                                                                                      |
| C                     | 9.49113200  | -1.83058500 | 1.12291600  |                                                                                      |
| C                     | 8.92806900  | -0.99806000 | 0.03395300  |                                                                                      |
| C                     | 7.47862500  | 0.63545800  | -1.77232200 |                                                                                      |
| C                     | 6.19767000  | 1.28447400  | -2.21356300 |                                                                                      |
| C                     | 8.61028100  | -0.34024300 | 3.05085500  |                                                                                      |
| C                     | 7.17471600  | -2.24926500 | 2.20608000  |                                                                                      |
| C                     | 7.97657300  | -1.53716600 | -0.90318400 |                                                                                      |
| C                     | 9.22660500  | 0.40364500  | -0.07314500 |                                                                                      |
| C                     | 7.79671900  | -0.76730200 | -2.15036500 |                                                                                      |
| C                     | 8.40216100  | 1.21988400  | -0.87075700 |                                                                                      |
| C                     | 5.99295800  | 1.13585100  | -3.74151800 |                                                                                      |
| C                     | 5.06455700  | 0.59136800  | -1.43321100 |                                                                                      |
| H                     | 9.11234700  | -2.42931900 | 3.12777700  |                                                                                      |
| H                     | 9.53035100  | -2.88200700 | 0.82796700  |                                                                                      |
| H                     | 10.49626900 | -1.48933200 | 1.38199100  |                                                                                      |
| H                     | 6.21096300  | 2.34581600  | -1.94063900 |                                                                                      |
| H                     | 8.04577900  | 0.36711000  | 2.43493000  |                                                                                      |
| H                     | 9.62569000  | 0.04228800  | 3.18899600  |                                                                                      |
| H                     | 8.13336800  | -0.36864300 | 4.03358900  |                                                                                      |
| H                     | 6.65408900  | -2.32135100 | 3.16396200  |                                                                                      |
| H                     | 6.60153000  | -1.56472900 | 1.57166800  |                                                                                      |



|   |             |             |             |
|---|-------------|-------------|-------------|
| H | 7.16397100  | -3.24617000 | 1.75369900  |
| H | 7.36665700  | -2.39721300 | -0.65736200 |
| H | 9.96181200  | 0.84084200  | 0.58765300  |
| H | 8.41215200  | -0.97162100 | -3.02455700 |
| H | 8.43267900  | 2.29714700  | -0.74484000 |
| H | 6.83222800  | 1.57847800  | -4.28092500 |
| H | 5.91796900  | 0.08123800  | -4.01486600 |
| H | 5.08310600  | 1.63976800  | -4.07396600 |
| N | 3.82367200  | 1.15474200  | -1.61488900 |
| H | 3.79377900  | 2.00053800  | -2.17454400 |
| C | 1.59385000  | 2.99896300  | -1.52003300 |
| C | 1.49563900  | 1.62406900  | -1.17639100 |
| C | 0.39685900  | 3.76502700  | -1.63953000 |
| C | 0.19071600  | 1.09680400  | -0.87886000 |
| C | 2.58264300  | 0.71782200  | -1.13656300 |
| C | -0.82099800 | 3.19307700  | -1.35822800 |
| H | 0.44072900  | 4.80041400  | -1.94667500 |
| C | 0.00654500  | -0.27441200 | -0.53240900 |
| C | 2.39326300  | -0.70780900 | -0.75808900 |
| H | -1.73947200 | 3.75049600  | -1.47049100 |
| C | 1.12074300  | -1.19410300 | -0.49016200 |
| H | 3.25732400  | -1.35093600 | -0.70437100 |
| C | 0.83949300  | -2.56290900 | -0.17820600 |
| C | -1.52950600 | -2.03629400 | -0.02897300 |
| C | -0.51146900 | -2.96251800 | 0.02484400  |
| H | 1.64466800  | -3.28305100 | -0.13430600 |
| H | -2.57177700 | -2.29473000 | 0.09521100  |
| H | -0.74968500 | -4.00020200 | 0.21247000  |
| H | 2.54601300  | 3.49552900  | -1.65548900 |
| N | -1.27081100 | -0.66794300 | -0.25917800 |
| N | -0.94301300 | 1.87176200  | -0.92936300 |
| O | -4.12593400 | -0.33918000 | -0.07148700 |
| N | -3.79324800 | 2.27415500  | 0.56914400  |
| N | -6.02518000 | -0.60231200 | 1.17114200  |
| C | -4.69992400 | 1.45380400  | 1.42487900  |
| C | -2.85396100 | 3.07658100  | 1.44316900  |
| C | -4.58520000 | 3.17668300  | -0.33532100 |
| C | -6.26224100 | -1.96300700 | 0.72282600  |
| C | -4.96377000 | 0.10770300  | 0.78393500  |
| C | -7.07309300 | -2.17211900 | -0.40369000 |
| C | -5.66827300 | -3.01141200 | 1.44528700  |
| C | -3.54146400 | 4.05956300  | 2.39954200  |
| C | -5.52050800 | 2.42428500  | -1.28017600 |
| C | -7.30168400 | -3.49666300 | -0.80593000 |
| C | -5.91589800 | -4.32262600 | 1.01271300  |
| C | -7.67109300 | -1.01024500 | -1.16142300 |
| C | -4.80019600 | -2.73330600 | 2.65069600  |
| C | -6.72889200 | -4.56397500 | -0.10258200 |

|                                      |             |             |             |                  |
|--------------------------------------|-------------|-------------|-------------|------------------|
| H                                    | -4.17382500 | 1.23148300  | 2.35690300  |                  |
| H                                    | -5.63338200 | 1.98166700  | 1.64680600  |                  |
| H                                    | -2.26418000 | 2.34993300  | 2.00396900  |                  |
| H                                    | -2.17731500 | 3.61707300  | 0.78122100  |                  |
| H                                    | -5.16684500 | 3.87275600  | 0.27950700  |                  |
| H                                    | -3.86883400 | 3.76621700  | -0.91099000 |                  |
| H                                    | -6.66586500 | -0.19856400 | 1.84556800  |                  |
| H                                    | -4.03955300 | 4.87824700  | 1.87762900  |                  |
| H                                    | -4.26968300 | 3.56586800  | 3.04841000  |                  |
| H                                    | -2.78313400 | 4.50378700  | 3.04833400  |                  |
| H                                    | -4.96673600 | 1.72903500  | -1.91153300 |                  |
| H                                    | -6.29778500 | 1.87845600  | -0.73698100 |                  |
| H                                    | -6.03015200 | 3.14372300  | -1.92503600 |                  |
| H                                    | -7.93174600 | -3.69005200 | -1.66536000 |                  |
| H                                    | -5.48054700 | -5.15273000 | 1.55557600  |                  |
| H                                    | -8.28921800 | -0.37981200 | -0.51564300 |                  |
| H                                    | -6.88811500 | -0.37830800 | -1.59281000 |                  |
| H                                    | -8.30082600 | -1.36810000 | -1.97618200 |                  |
| H                                    | -5.37885600 | -2.27860900 | 3.46102900  |                  |
| H                                    | -4.37316300 | -3.66152200 | 3.03232100  |                  |
| H                                    | -3.97996400 | -2.05051300 | 2.40870100  |                  |
| H                                    | -6.91957100 | -5.58118900 | -0.41983400 |                  |
| Cu                                   | -2.57920600 | 0.84463000  | -0.46060400 |                  |
| O                                    | -2.24405000 | -0.00060600 | 2.46841600  |                  |
| H                                    | -1.87476800 | -0.27862900 | 3.32430900  |                  |
| H                                    | -1.73835200 | -0.35465600 | 1.70628100  |                  |
| O                                    | -3.16158700 | 0.40643300  | -2.53840000 |                  |
| H                                    | -3.66338900 | -0.42904400 | -2.56360500 |                  |
| H                                    | -2.58292100 | 0.53382000  | -3.30928200 |                  |
| Energy calculation at M05-2X/LanL2DZ |             |             |             | HF=-2286.4879208 |

**Table S2.** Natural population charges of heavy atoms in the copper (II) complex calculated at the M05-2X/6-311++g(2df,2p) level of theory.

| Atom | No | Natural charge | Spin Density | Atom | No | Natural charge | Spin Density |
|------|----|----------------|--------------|------|----|----------------|--------------|
| O    | 1  | -0.6326        | 0.0001       | C    | 46 | -0.1016        | -0.0044      |
| C    | 2  | -0.2374        | 0.0000       | C    | 47 | 0.0846         | -0.0056      |
| C    | 3  | -0.4144        | 0.0000       | C    | 48 | -0.2267        | 0.0065       |
| C    | 4  | -0.0314        | 0.0000       | N    | 53 | -0.5900        | 0.0626       |
| C    | 5  | -0.0906        | -0.0001      | N    | 54 | -0.6018        | 0.0479       |
| C    | 6  | -0.3318        | 0.0000       | O    | 55 | -0.7547        | 0.0500       |
| C    | 7  | -0.5910        | 0.0000       | N    | 56 | -0.6248        | 0.0516       |
| C    | 8  | -0.5898        | 0.0000       | N    | 57 | -0.5870        | -0.0018      |
| C    | 9  | -0.2025        | 0.0000       | C    | 58 | -0.2762        | 0.0049       |
| C    | 10 | -0.2014        | 0.0000       | C    | 59 | -0.1695        | 0.0001       |
| C    | 11 | -0.2202        | 0.0000       | C    | 60 | -0.1749        | 0.0031       |
| C    | 12 | -0.2061        | 0.0000       | C    | 61 | 0.1003         | 0.0021       |
| C    | 13 | -0.5767        | 0.0000       | C    | 62 | 0.7631         | 0.0011       |
| C    | 14 | 0.7535         | 0.0000       | C    | 63 | -0.0210        | -0.0006      |
| N    | 32 | -0.6613        | 0.0002       | C    | 64 | -0.0293        | -0.0004      |
| C    | 34 | -0.0842        | -0.0033      | C    | 65 | -0.6212        | 0.0012       |
| C    | 35 | -0.1364        | 0.0026       | C    | 66 | -0.6187        | -0.0005      |
| C    | 36 | -0.1993        | 0.0039       | C    | 67 | -0.1958        | 0.0004       |
| C    | 37 | 0.3058         | -0.0040      | C    | 68 | -0.2054        | -0.0002      |
| C    | 38 | 0.1991         | 0.0003       | C    | 69 | -0.6123        | 0.0001       |
| C    | 39 | 0.0924         | -0.0005      | C    | 70 | -0.6071        | 0.0000       |
| C    | 41 | 0.2692         | -0.0001      | C    | 71 | -0.1614        | 0.0000       |

---

|   |    |         |        |    |    |         |        |
|---|----|---------|--------|----|----|---------|--------|
| C | 42 | -0.1792 | 0.0003 | Cu | 94 | 1.1682  | 0.7791 |
| C | 44 | -0.1186 | 0.0030 | O  | 95 | -0.9495 | 0.0003 |
|   |    |         |        | O  | 98 | -0.9486 | 0.0000 |

---

**Table S3.** Natural bond orbital (NBO) analysis of the copper (II) complex calculated at the M05-2X/6-311++g(2df,2p) level of theory

| Donor NBO (i)       | Acceptor NBO (j) | E(2), kJ/mol |
|---------------------|------------------|--------------|
| LP(1) N53           | LP*(5) Cu94      | 120.20       |
| LP(1) N53           | LP*(6) Cu94      | 49.60        |
| LP(1) N53           | LP*(8) Cu94      | 52.70        |
| LP(1) N54           | LP*(5) Cu94      | 40.30        |
| LP(1) N54           | LP*(6) Cu94      | 98.90        |
| LP(1) N54           | LP*(7) Cu94      | 37.10        |
| LP(1) O55           | LP*(6) Cu94      | 94.2         |
| LP(1) O55           | LP*(7) Cu94      | 50.00        |
| LP(1) O55           | LP*(8) Cu94      | 32.30        |
| LP(1) O55           | LP*(9) Cu94      | 395.8        |
| LP(2) O55           | LP*(6) Cu94      | 166.00       |
| LP(2) O55           | LP*(7) Cu94      | 82.40        |
| LP(2) O55           | LP*(8) Cu94      | 26.20        |
| LP(2) O55           | LP*(9) Cu94      | 223.70       |
| LP(3) O55           | LP*(9) Cu94      | 47.00        |
| $\sigma(1)$ N56–C59 | LP*(9) Cu94      | 237.1        |
| LP(1) N56           | LP*(5) Cu94      | 73.8         |
| LP(1) N56           | LP*(6) Cu94      | 57.6         |
| LP(1) N56           | LP*(8) Cu94      | 35.9         |
| $\sigma(1)$ O95–H96 | LP*(9) Cu94      | 28.7         |
| $\sigma(1)$ O95–H97 | LP*(9) Cu94      | 26.9         |
| LP(2) O95           | LP*(9) Cu94      | 81.3         |
| $\sigma(1)$ O98–H99 | LP*(6) Cu94      | 37.1         |
| LP(2) O98           | LP*(6) Cu94      | 124.1        |
| LP(2) O98           | LP*(9) Cu94      | 844.9        |
